# Supplementary material
Source: PubMed Central journal article supplement (PMC3269780)
Supplement: NIHMS273875-supplement-Supplementary_Data.pdf [file NIHMS273875-supplement-Supplementary_Data.pdf]

**Burke et al. Supporting Information Figure Legends:**

Figure 1S: **Effect of MPT inhibitors on APAP-induced DCFH<sub>2</sub> oxidation in freshly isolated hepatocytes.** Hepatocytes were incubated with APAP (1 mM). Subsequently, hepatocytes were washed to remove APAP (arrow) and incubated in media alone (triangle), media containing cyclosporine A (10 uM)(CSP) (square), or media containing trifluoperazine (10 uM)(TFP) (diamond) for 2-5h. Control hepatocytes were incubated with media alone for 2h, washed, and subsequently incubated with media alone for 2-5h (circle). In Figure 3, appropriate time points were taken and relative toxicity was measured using ALT release. In this figure hepatocytes were resuspended with 2', 7'-dichlorodihydrofluorescein diacetate (10 μM) for 25 min and fluorescence determined as previously described (13). Samples which significantly increased from the 2h wash are indicated by \* (p ≤ 0.05). Samples (n = 3 from separate mice) which are significantly decreased from APAP alone at the same time point are designated by †† (\* (p ≤ 0.05).

Figure 2S: **Effect of NOS inhibitors on APAP -induced DCFH<sub>2</sub> oxidation in freshly isolated hepatocytes.** Hepatocytes were incubated with APAP (1 mM) for 2h, washed to remove APAP (arrow), and subsequently incubated in media alone (2-5h) (triangle). Control hepatocytes were incubated in media alone for 2h, washed, and subsequently incubated in media alone (2-5h)(circle). Following washing to remove APAP some hepatocytes shown in A and Figure 4A were incubated with the general NOS inhibitor L-NMMA (1 mM) (diamond) or the nNOS inhibitor 7-nitroindazole (10 μM) (square) (2-5h). Following washing to remove APAP other hepatocytes shown in B and Figure 4B were incubated with the iNOS inhibitors L-NIL (1 mM) (square) or SAIT (1 mM)

(diamond) (2-5h). In Figures 4A and 4B aliquots were taken and toxicity determined by ALT release. Other hepatocytes (A and B) cells were resuspended with 2', 7'-dichlorodihydrofluorescein diacetate (10  $\mu$ M) for 25 min and fluorescence determined as previously described (13). Samples (n = 3 from separate mice) which significantly increased from the same 2 h incubation are indicated by \* ( $p \leq 0.05$ ).

**Figure 3S: Effect of reactive nitrogen species scavengers on APAP-induced DCFH<sub>2</sub> oxidation in freshly isolated hepatocytes.** Hepatocytes were incubated with APAP (1 mM) for 2 h, washed to remove APAP (arrow), and subsequently incubated in media alone (2-5h) (triangle). Control hepatocytes were incubated in media alone for 2h, washed, and subsequently incubated in media alone (2-5h)(circle). Following washing to remove APAP some hepatocytes were incubated with the RNS scavengers N-acetylcysteine (1 mM) (square) or acetaminophen (50 mM) (diamond)(2-5h). Aliquots from hepatocyte incubations (A) were taken and toxicity determined by ALT release. Other hepatocytes (B) were resuspended with 2', 7'-dichlorodihydro-fluorescein diacetate (10  $\mu$ M) for 25 min and fluorescence determined as previously described (13). Samples (n = 3 from separate mice) which significantly increased from the same 2h incubation are indicated by \* ( $p \leq 0.05$ ).

Burke et al. Supporting Information Figures

Figure 1S

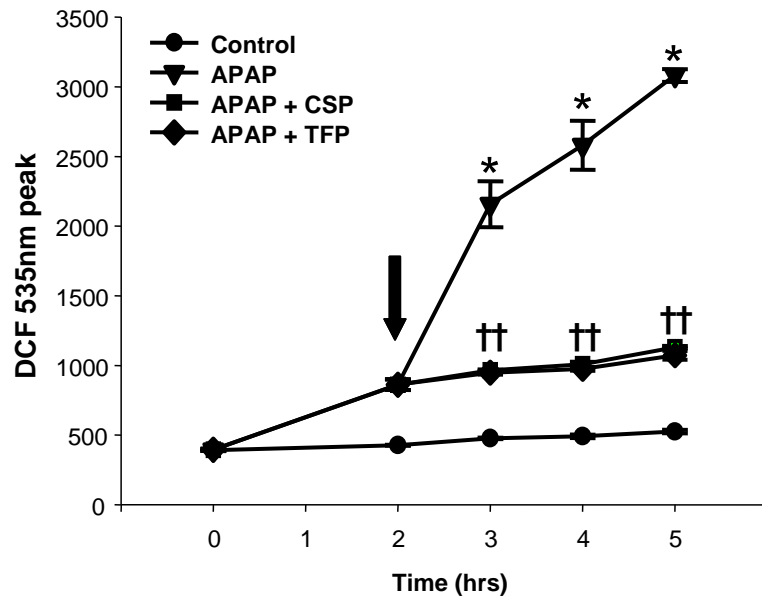

Figure 2SA

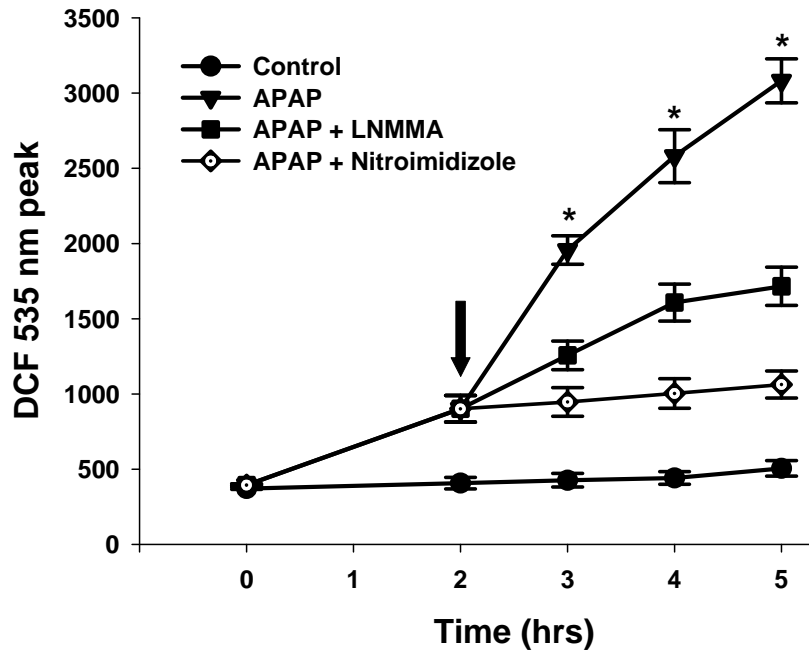

Figure 2SB

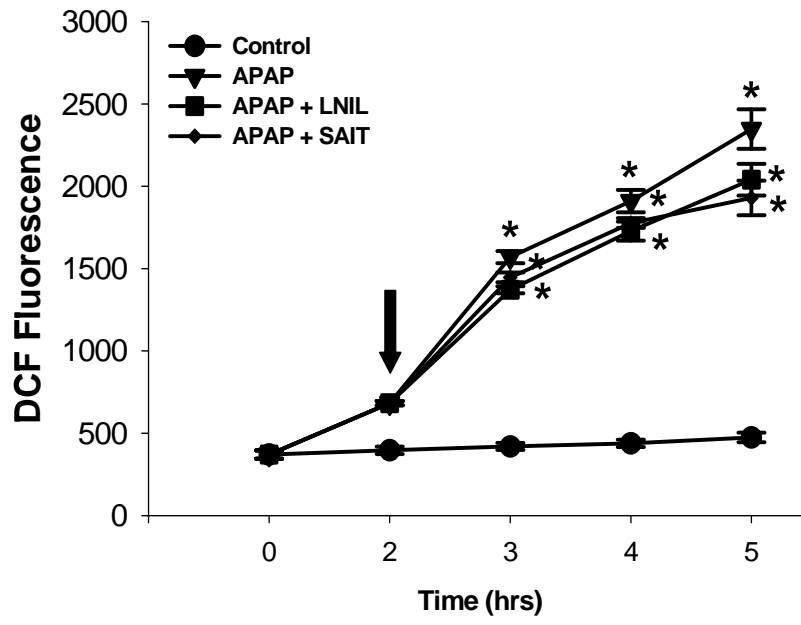

Figure 3

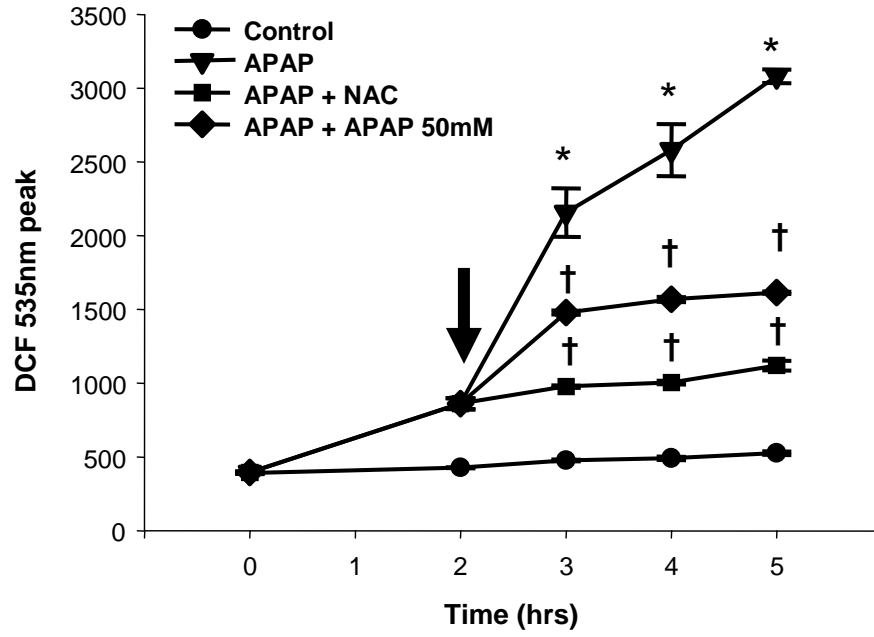

†
